# Supplementary material
Source: publisher site journal article supplement (https://www.dovepress.com/get_supplementary_file.php?f=360912.docx)
Supplement: Supplementary file 1 [file get_supplementary_file.php]

**Table S1** The thermal cycling for the KASP.

| Step | Description | Tem | Time | NO. of cycle |
| --- | --- | --- | --- | --- |
| 1 | Activation | 94°C | 15mins | 1 |
| 2 | Denaturation | 94°C | 20s | 10 |
| Annealing/Elongation | 61-55°C | 60s |
| 3 | Denaturation | 94°C | 20s | 26 |
| Annealing/Elongation | 55°C | 60s |

**Table S2** Primers of the studied SNPs for KASP genotyping.

| **ID** | **Primer_AlleleX** | **Primer_AlleleY** | **Primer_Common** |
| --- | --- | --- | --- |
| FTO_rs1421091 | ATTTGTTGAGCACCTATTATTTGCCATAA | GTTGAGCACCTATTATTTGCCATAC | TTTGGTGCAGTGATTCTATTTCAGCCAAA |
| FTO_rs1421092 | GAATTGCCTGGTTTAAATTACATTCAGTG | GAATTGCCTGGTTTAAATTACATTCAGTA | CTTAAAATACGGCCTTTCCTCCCATATAA |
| FTO_rs2287142 | GATGAATGCAACGGTATGGCCAC | ATGATGAATGCAACGGTATGGCCAT | TCGAACCCTGCAGGGAAGTTAAGAA |
| FTO_rs9939609 | ACAGAGACTATCCAAGTGCATCACT | ACAGAGACTATCCAAGTGCATCACA | CTGAATTATTATTCTAGGTTCCTTGCGACT |
| ALKBH1_rs1048147 | AAACACTTCTCTGAGCAAAGTGGC | CAAACACTTCTCTGAGCAAAGTGGA | CCTTGGAACCCACGCAGAAGTAAA |
| ALKBH1_rs1076496 | GGAAATCTTCAGTATACCGGGAAACA | GAAATCTTCAGTATACCGGGAAACG | CCCTGTGAGCAGATCACAATGAAGAA |
| ALKBH1_rs11159286 | ATGGCGGCCTCAGCAGCGA | GGCGGCCTCAGCAGCGC | AAAAGCAACCGGCTGATTGATACTTCTA |

**Table S3** The associations of *ALKBH1* haplotypes with the risk of GC of each Lauren’s classification.

| ***ALKBH1* haplotype** | **Control (N=569)** |  | **Mixed type** | | |  | **Diffuse type** | | |  | **Intestinal type** | | |
| --- | --- | --- | --- | --- | --- | --- | --- | --- | --- | --- | --- | --- | --- |
|  | **Cancer** | **OR (95% CI)** | ***p*** |  | **Cancer** | **OR (95% CI)** | ***p*** |  | **Cancer** | **OR (95% CI)** | ***p*** |
| CGC | 44.9% |  | 42.7% | 1 |  |  | 49.7% | 1 |  |  | 42.7% | 1 |  |
| AAC | 28.4% |  | 35.8% | 1.34 (0.96-1.87) | 0.081 |  | 26.7% | 0.85 (0.63-1.15) | 0.301 |  | 30.6% | 1.23 (0.88-1.74) | 0.233 |
| CAA | 21.2% |  | 17.1% | 0.87 (0.58-1.30) | 0.490 |  | 19.5% | 0.84 (0.60-1.19) | 0.332 |  | 20.5% | 1.08 (0.73-1.59) | 0.709 |
| CAC | 4.7% |  | 3.6% | 0.73 (0.33-1.63) | 0.451 |  | 3.7% | 0.68 (0.34-1.35) | 0.270 |  | 3.9% | 0.69 (0.32-1.51) | 0.362 |

**Notes:** All analyses were adjusted by sex and age.

**Abbreviations:** CI: confidence interval; GC: gastric cancer; OR: odds ratio; SNP: single nucleotide polymorphism.
